# Supplementary material for: Plant-exuded chemical signals induce surface attachment of the bacterial pathogen Pseudomonas syringae
Source: PeerJ. 2023 Mar 27;11:e14862. doi: 10.7717/peerj.14862 (PMC10062345; doi:10.7717/peerj.14862)
Supplement: Supplemental Information 4 [file peerj-11-14862-s004.xlsx]

## Sheet: Sheet1
Table S1. Strain list
Strain	Plasmids & Relevant Features	Source
Pseudomonas syringae pv. tomato DC3000	Wildtype, RifR	G. Martin (Cornell)
Pseudomonas syringae pv. tomato DC3000	pBBR1-MCS1, CmR	O'Malley et al., 2020
Pseudomonas syringae pv. tomato DC3000	gacApromoter:gacA::pBBR1-MCS1, CmR	O'Malley et al., 2020
Pseudomonas syringae pv. tomato DC3000	pVSP61, KanR	B. Kunkel (Wash U), Sreedharan et al., 2006
Pseudomonas syringae pv. tomato DC3000	hrpL:pVSP61, KanR	B. Kunkel (Wash U), Sreedharan et al., 2006
Pseudomonas syringae pv. tomato DC3000 AC811	Tn5::gacA, KanR	A. Chatterjee, Chatterjee et al., 2003
Pseudomonas syringae pv. tomato DC3000 AC811	pBBR1-MCS1, CmR	O'Malley et al., 2020
Pseudomonas syringae pv. tomato DC3000 AC811	gacApromoter:gacA::pBBR1-MCS1, CmR	O'Malley et al., 2020
Pseudomonas syringae pv. tomato DC3000 hrpL-	Tn5::hrpL, SpR; pVSP61, KanR	B. Kunkel (Wash U), Zwiesler-Vollick et al., 2002
Pseudomonas syringae pv. tomato DC3000 hrpL-	Tn5::hrpL, SpR; hrpL:pVSP61, KanR	B. Kunkel (Wash U), Sreedharan et al., 2006
