# Supplementary material for: Plant-exuded chemical signals induce surface attachment of the bacterial pathogen Pseudomonas syringae
Source: PeerJ. 2023 Mar 27;11:e14862. doi: 10.7717/peerj.14862 (PMC10062345; doi:10.7717/peerj.14862)
Supplement: Supplemental Information 5 [file peerj-11-14862-s005.xlsx]

## Sheet: Fig1B
A562							avg	avg-no bact control	SE
MM	0.059	0.063	0.065	0.064	0.069	0.076	0.066	0.0035	0.00239444
MM+F	0.235	0.189	0.18	0.219	0.209	0.239	0.211833	0.149333	0.00977895
MM+F+Ex	0.381	0.324	0.295	0.306	0.334	0.313	0.3255	0.263	0.0124117
MM+Ex	0.065	0.069	0.072	0.067	0.062	0.063	0.0663333	0.00383333	0.001542
No bact	0.0625
	t-test
MM vs. MMF	4.88862e-08
MM vs. MMFE	1.66226e-09
MM vs. MME	0.909145
MMF vs. MMFE	2.94855e-05
MMF vs. MME	4.25226e-08
MMFE vs. MME	1.51721e-09

## Sheet: Fig1C
	cfu	dil factor
MM-plank	199	10000		199000000	8.29885	8.28161	0.0288683
	160	10000		160000000	8.20412
	191	10000		191000000	8.28103
	220	10000		220000000	8.34242
MM-att	792	100		7920000	6.89873	6.85456	0.0212898
	652	100		6520000	6.81425
	764	100		7640000	6.88309
	664	100		6640000	6.82217
Fex-plank	138	10000		138000000	8.13988	8.15762	0.0355024
	123	10000		123000000	8.08991
	139	10000		139000000	8.14301
	181	10000		181000000	8.25768
Fex-att	177	10000		177000000	8.24797	8.29836	0.0175418
	211	10000		211000000	8.32428
	209	10000		209000000	8.32015
	200	10000		200000000	8.30103
		S2A: percent att
			total(MM)	206920000	3.82757	3.62973
				166520000	3.91545	0.23409
				198640000	3.84615
				226640000	2.92976
			total(Fex)	315000000	56.1905	57.9788
				334000000	63.1737	2.32011
				348000000	60.0575
				381000000	52.4934
				t.test	4.09139e-07
		S2B: total bact	MM	8.3158	8.29767
				8.22147	0.0280793
				8.29807
				8.35534
			Fex	8.49831	8.53614
				8.52375	0.0173684
				8.54158
				8.58092
				t.test	0.000357114

## Sheet: Fig2
A562						avg	SE
	no_ex	0.093	0.09	0.087		0.09	0.00173205
	w	0.434	0.548	0.285		0.422333	0.0761453
	m	0.161	0.155	0.185		0.167	0.00916515
	mm6	0.298	0.338	0.465		0.367	0.0503422
	t-test
no vs w	0.0120307
no vs m	0.00117461
no vs mm6	0.0053313
w vs m	0.0291272
w vs mm6	0.577113
m vs mm6	0.0174149

## Sheet: Fig3A
A562
MM	MMF(50)	MMFA	MMFC	MMFG
0.1127	0.4376	0.7119	0.6337	0.5942
0.1382	0.4624	0.7442	0.5466	0.573
0.1275	0.5032	0.7622	0.6206	0.6062
0.1393	0.424	0.7122	0.587	0.4774
MM	MMF(50)	MMFA	MMFC	MMFG
0.129425	0.4568	0.732625	0.596975	0.5627	avg
0.00617756	0.0173897	0.0124344	0.0194594	0.0292499	SE
	t.test
M vs F	2.06103e-06
M vs FA	9.95584e-09
M vs FC	4.54193e-07
M vs FG	6.76404e-06
F vs FA	1.33323e-05
F vs FC	0.00170977
F vs FG	0.0207938
FA vs FC	0.00107774
FA vs FG	0.00175062
FC vs FG	0.366931

## Sheet: Fig3B
A562
fru	CIT	HBA	GLYC	VAL	THR
0.184	0.496	0.497	0.204	0.123	0.214
0.209	0.577	0.547	0.239	0.124	0.207
0.24	0.621	0.549	0.231	0.215	0.26
0.222	0.556	0.477	0.22	0.149	0.211
fru	CIT	HBA	GLYC	VAL	THR
0.21375	0.5625	0.5175	0.2235	0.15275	0.223	avg
0.0117783	0.025976	0.0180808	0.00757738	0.0216039	0.0124164	SE
	t-test
F v C	1.8213e-05
F v HB	8.02327e-06
F v G	0.512374
F v V	0.047866
F v T	0.608325
C v HB	0.204908
C v G	1.58179e-05
C v V	1.90981e-05
C v T	2.24704e-05
HB v G	5.53756e-06
HB v V	1.30648e-05
HB v T	1.05709e-05
G v V	0.0213797
G v T	0.973694
V v T	0.0303832

## Sheet: Fig4
A562
	MM			MMFC
WT hrpL	0.1129	0.1187	0.1269	0.7495	0.8115	0.8375
hrpL EV	0.1379	0.1241	0.1237	0.5963	0.5219	0.5182
hrpL hrpL	0.1272	0.1324	0.1404	0.8404	0.8715	0.9423
WT EV	0.1532	0.1332	0.142	0.8371	0.8062	0.8701
avg	MM	MMFC		SE	MM	MMFC
hrpL EV	0.128567	0.545467		hrpL EV	0.0046681	0.0254391
hrpL hrpL	0.133333	0.884733		hrpL hrpL	0.00383898	0.030151
WT EV	0.1428	0.8378		WT EV	0.00578734	0.0184497
WT hrpL	0.1195	0.7995		WT hrpL	0.0040612	0.0261024

## Sheet: Fig5
A562
Wevmm	Wgmm	Aevmm	Agmm	Wevfc	Wgfc	Aevfc	Agfc
0.138	0.211	0.1987	0.3894	0.6196	0.1536	1.4109	0.2365
0.1591	0.1855	0.1955	0.3361	0.6791	0.1504	1.4374	0.2295
0.1806	0.1895	0.1867	0.3615	0.6256	0.1289	1.4731	0.3346
Wevmm	Wgmm	Aevmm	Agmm	Wevfc	Wgfc	Aevfc	Agfc
0.159233	0.195333	0.193633	0.362333	0.641433	0.1443	1.44047	0.266867	avg
0.0122977	0.00791798	0.00358763	0.015392	0.0189128	0.00775521	0.0180209	0.0339269	SE

## Sheet: FigS1
A562
			Replicate 1	Replicate 2	Replicate 3	Replicate 4	avg	SD
DC3000	-fructose	-tom exudate	0.105	0.107	0.114	0.112	0.1095	0.00420317
DC3000	+fructose	-tom exudate	0.143	0.167	0.147	0.14	0.14925	0.0121758
DC3000	+fructose	+tom exudate	0.257	0.239	0.218	0.226	0.235	0.0170294
DC3000	-fructose	+tom exudate	0.115	0.121	0.128	0.125	0.12225	0.00561991
			ttest
			0.000831209	0.000178304	1.5482e-05
			7.28731e-06	0.00690542
			0.0109181

## Sheet: FigS2A
A562								avg	SE
+ exudate	-	0.081	0.092	0.088	0.084	0.082	0.077	0.084	0.00217562
+ exudate	+fructose	0.519	0.5	0.492	0.434	0.378	0.236	0.4265	0.0435689	1.38724e-05
+ exudate	+glucose	0.158	0.162	0.179	0.152	0.139	0.127	0.152833	0.00742705	4.60181e-06
+ exudate	+galactose	0.516	0.369	0.401	0.415	0.417	0.331	0.408167	0.0253593	1.66569e-07
+ exudate	+sucrose	0.151	0.154	0.158	0.167	0.148	0.13	0.151333	0.00504425	2.39285e-07
+ exudate	+mannitol	0.695	0.658	0.658	0.648	0.517	0.423	0.599833	0.0433108	3.1729e-07

## Sheet: FigS2B
A562									avg	se
- exudate	-	0.073	0.071	0.072	0.074	0.067	0.069		0.071	0.00106458
- exudate	+fructose	0.117	0.112	0.116	0.13	0.122	0.112		0.118167	0.00280971	2.2566e-08
- exudate	+glucose	0.072	0.073	0.07	0.071	0.071	0.079		0.0726667	0.00133333	0.351692
- exudate	+galactose	0.161	0.161	0.181	0.164	0.189	0.197		0.1755	0.00639661	3.45637e-07
- exudate	+sucrose	0.063	0.064	0.063	0.065	0.065	0.068		0.0646667	0.000760117	0.0051603
- exudate	+mannitol	0.147	0.166	0.145	0.114	0.139	0.105		0.136	0.00923038	0.000443085

[truncated: 2 more sheets: FigSC, FigS3]
